# Supplementary material for: n-Type thermoelectric materials based on CuTCNQ nanocrystals and CuTCNQ nanorod arrays
Source: Royal Society of Chemistry journal article supplement (doi:10.1039/c4ta06475e), 2014-12-08
Supplement: c4ta06475e1.pdf [file c4ta06475e1.pdf]

Supplementary information:

**N-type thermoelectric materials based on CuTCNQ  
nanocrystals and CuTCNQ nanorod arrays**

**Yuanhui Sun,<sup>a,b</sup> Fengjiao Zhang,<sup>a,b</sup> Yimeng Sun,<sup>a</sup> Chong'an Di,<sup>\*a</sup> Wei Xu,<sup>\*a</sup> and Daoben Zhu<sup>\*a</sup>**

<sup>a</sup> Beijing National Laboratory for Molecular Sciences, Key Laboratory of Organic Solids,  
Institute of Chemistry, Chinese Academy of Sciences, Beijing, 100190, China.

<sup>b</sup> University of Chinese Academy of Sciences, Beijing, 100049, China.

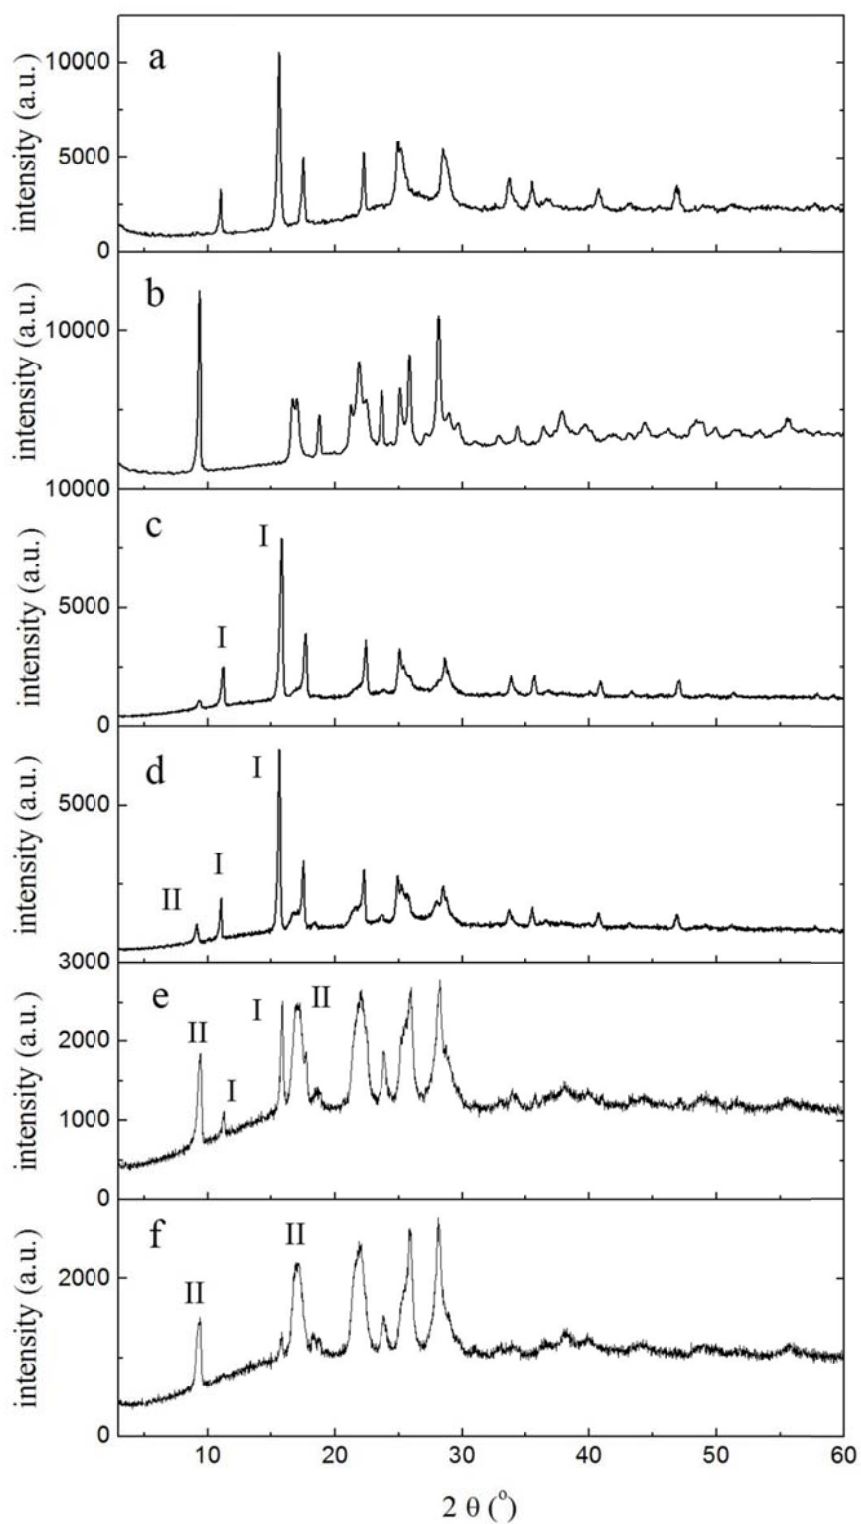

**Figure S1.** XRD patterns for a) CuTCNQ phase I needles, b) CuTCNQ phase II platelets and CuTCNQ-F<sub>4</sub>TCNQ blends (c) B1-CuTCNQ, (d) B2-CuTCNQ, (e) B3-CuTCNQ and (f) B4-CuTCNQ.

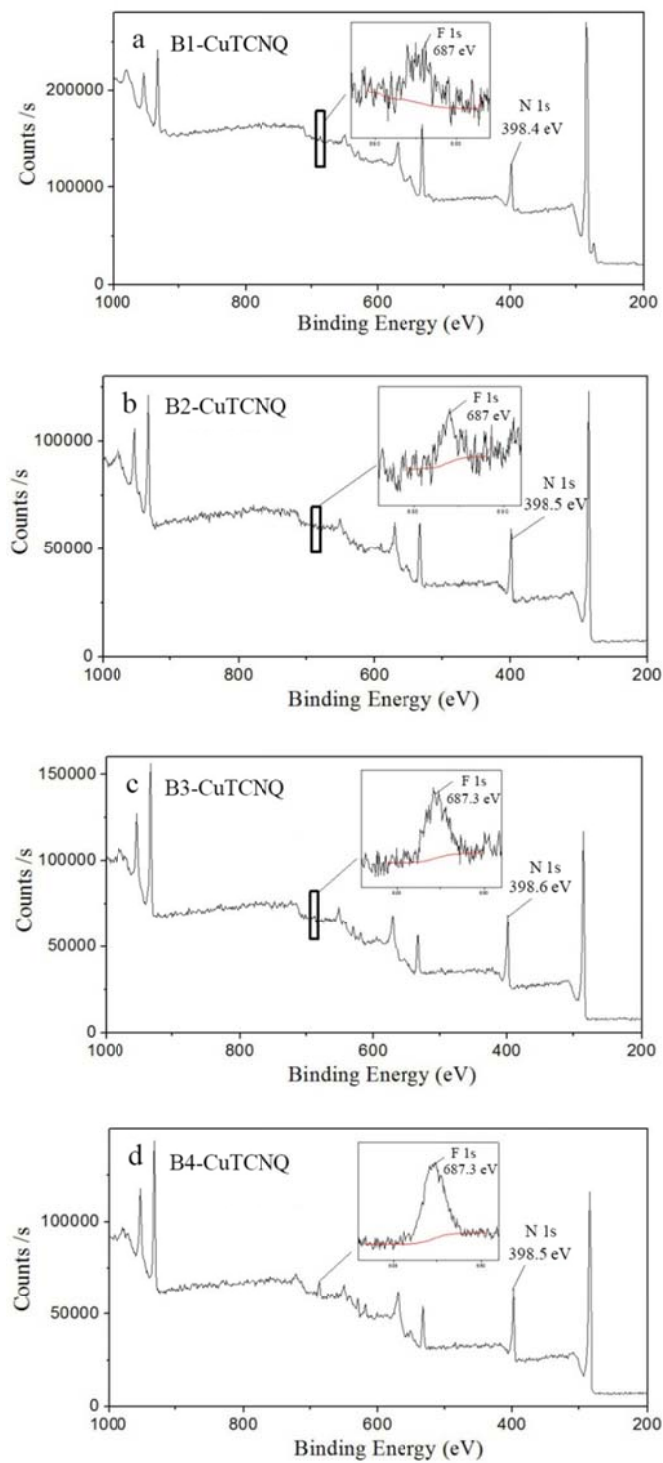

**Figure S2.** X-Ray photoelectron spectra of CuTCNQ blends a) with 0.97% F<sub>4</sub>TCNQ ratio (B1-CuTCNQ), b) with 2.98% F<sub>4</sub>TCNQ ratio (B2-CuTCNQ); c) with 3.2% F<sub>4</sub>TCNQ ratio (B3-CuTCNQ) and d) with 6.59% F<sub>4</sub>TCNQ ratio (B4-CuTCNQ). (Inset: F 1s peak spectra).

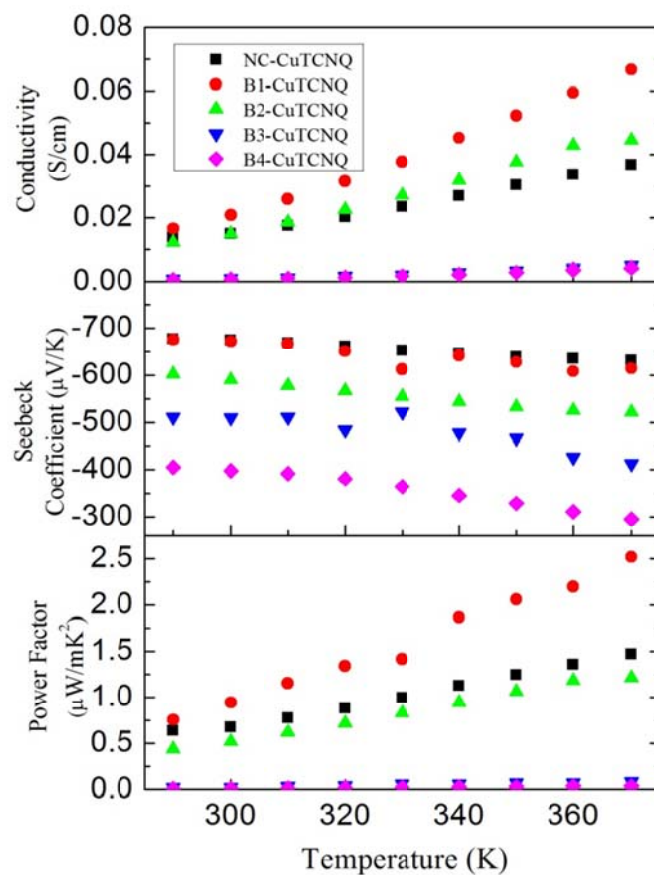

**Figure S3.** (Color online) Temperature dependence of a) Seebeck coefficient, b) electrical conductivity and c) power factors of NC-CuTCNQ and CuTCNQ blends with a series of  $\text{F}_4\text{TCNQ}$  concentration (mol %).

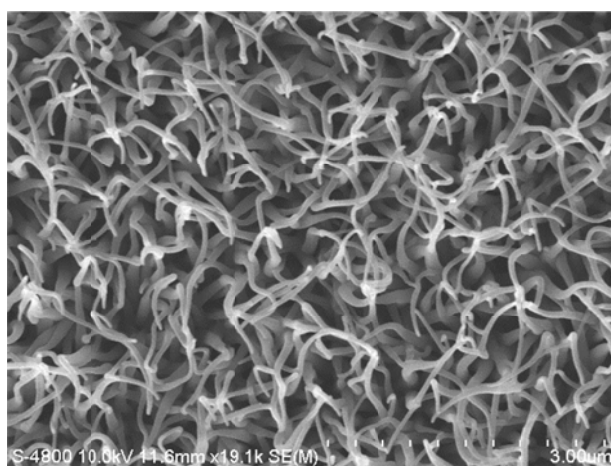

**Figure S4.** The SEM image of NrA-CuTCNQ films prepared in situ on 30 nm copper film.

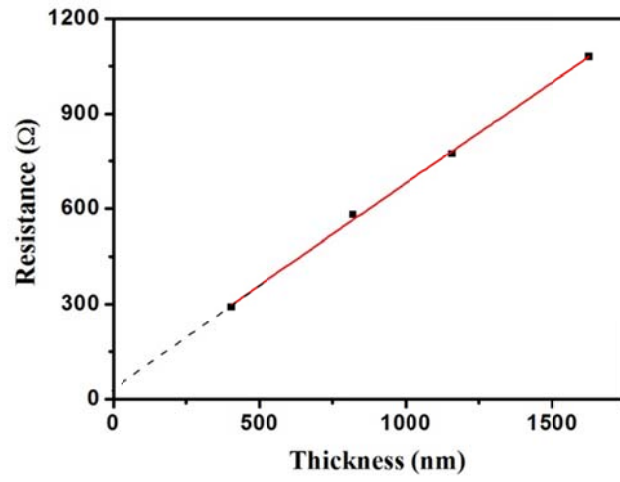

**Figure S5.** The resistance in the direction of the nanorods versus thickness of NrA-CuTCNQ films.
